# Supplementary material for: Variability and Nativeness in the Mediterranean Taxa: Divergence and Phylogeography of Genista etnensis (Fabaceae) Inferred from Nuclear and Plastid Data
Source: MDPI journal article supplement (doi:10.3390/plants11223171), 2022-11-19
Supplement: s1 [file s1]

## Supplementary Information for

Variability and nativeness in the Mediterranean taxa: divergence and phylogeography of *Genista etnensis* (Fabaceae) inferred from nuclear and plastid data.

Olga De Castro<sup>1</sup>, Gianluigi Bacchetta<sup>2</sup>, Salvatore Brullo<sup>3</sup>, Emanuele Del Guacchio<sup>1\*</sup>, Emanuela Di Iorio<sup>1</sup>, Carole Piazza<sup>4</sup>, Paolo Caputo<sup>1</sup>

## Supplementary File S1.

**Table S1.** Information and results on the molecular markers tested (+ = variable sequence; 0 = non-variable sequence; x = amplified with abnormal structure; - = low amplification efficiency) (Pr = plastid DNA; N = nuclear DNA).

| Cod.           | Marcatore                                      | Ref. | Note | Cod.        | Marcatore                                                       | Ref. | Note |
|----------------|------------------------------------------------|------|------|-------------|-----------------------------------------------------------------|------|------|
| <b>Pr1</b>     | <i>trnQ</i> <sup>(UUG)</sup> - <i>psbK</i> IGS | 1    | +    | <b>Pr23</b> | <i>ycf4-ycf10</i> IGS                                           | 1    | 0    |
| <b>Pr2</b>     | <i>psbK-trnS</i> <sup>(GCU)</sup> IGS          | 1    | x    | <b>Pr24</b> | <i>petA-psbJ</i> IGS                                            | 1    | -    |
| <b>Pr3</b>     | <i>trnG</i> <sup>(UCC)</sup> - <i>atpA</i> IGS | 1    | +    | <b>Pr25</b> | <i>petL-psaJ</i> IGS                                            | 1    | -    |
| <b>Pr4</b>     | <i>atpF</i> intron                             | 1    | 0    | <b>Pr26</b> | <i>psaJ-rpL20</i> IGS                                           | 1    | x    |
| <b>Pr5</b>     | <i>atpF-atpH</i> IGS                           | 1    | 0    | <b>Pr27</b> | <i>rpL20-rpS12</i> IGS                                          | 1    | -    |
| <b>Pr6</b>     | <i>atpH-atpI</i> IGS                           | 1    | -    | <b>Pr28</b> | <i>clpP</i> intron 2                                            | 1    | -    |
| <b>Pr7</b>     | <i>rpoC1</i> intron                            | 1    | x    | <b>Pr29</b> | <i>clpP</i> intron 1                                            | 1    | -    |
| <b>Pr8</b>     | <i>trnS</i> <sup>(UGA)</sup> - <i>psbZ</i> IGS | 1    | +    | <b>Pr30</b> | <i>clpP-psbB</i> IGS                                            | 1    | 0    |
| <b>Pr9</b>     | <i>psaA-ycf3</i> IGS                           | 1    | +    | <b>Pr31</b> | <i>psbH-petB</i> IGS                                            | 1    | -    |
| <b>Pr10</b>    | <i>ycf3</i> intron 2                           | 1    | +    | <b>Pr32</b> | <i>petB-petD</i> IGS                                            | 1    | -    |
| <b>Pr11</b>    | <i>ycf3</i> intron 1                           | 1    | +    | <b>Pr33</b> | <i>rpS3-rpS19</i> IGS                                           | 1    | 0    |
| <b>Pr12</b>    | <i>ycf3-trnS</i> <sup>(GGA)</sup> IGS          | 1    | -    | <b>Pr34</b> | <i>ccsA-ndhD</i> IGS                                            | 1    | x    |
| <b>Pr13-14</b> | <i>rpS4-trnT</i> <sup>(UGU)</sup> _ver.1       | 1    | +    | <b>Pr35</b> | <i>psaC-ndhE</i> IGS                                            | 1    | 0    |
| <b>Pr15</b>    | <i>trnF</i> <sup>(GAA)</sup> - <i>ndhJ</i> IGS | 1    | +    | <b>Pr36</b> | <i>ndhE-ndhI</i> IGS                                            | 1    | x    |
| <b>Pr16</b>    | <i>ndhC-trnV</i> <sup>(UAC)</sup> IGS          | 1    | -    | <b>Pr37</b> | <i>rpS15-ycf1</i> IGS                                           | 1    | x    |
| <b>Pr17</b>    | <i>trnV</i> <sup>(UAC)</sup> intron            | 1    | 0    | <b>Pr38</b> | <i>psbA-trnH</i> <sup>(GUG)</sup> IGS                           | 2    | +    |
| <b>Pr18</b>    | <i>trnV</i> <sup>(UAC)</sup> - <i>atpE</i> IGS | 1    | +    | <b>Pr39</b> | <i>trnQ</i> <sup>(UUG)</sup> - <i>rps16</i> IGS                 | 3    | 0    |
| <b>Pr19</b>    | <i>atpB-rbcL</i> IGS                           | 1    | 0    | <b>Pr40</b> | <i>trnL</i> <sup>(UAA)</sup> intron                             | 4    | 0    |
| <b>Pr20</b>    | <i>rbcL-accD</i> IGS                           | 1    | x    | <b>Pr41</b> | <i>trnL</i> <sup>(UAA)</sup> - <i>trnF</i> <sup>(GAA)</sup> IGS | 4    | 0    |
| <b>Pr21</b>    | <i>accD-psaI</i> IGS                           | 1    | -    | <b>Pr42</b> | <i>trnG</i> <sup>(UCC)</sup> - <i>trnS</i> <sup>(GCU)</sup> IGS | 5    | +    |
| <b>Pr22</b>    | <i>psaI-ycf4</i> IGS                           | 1    | 0    | <b>N43</b>  | ITS1-ITS2                                                       | 6    | +    |

## References

- 1 Prince, L.M. Plastid Primers for Angiosperm Phylogenetics and Phylogeography. *Appl. Plant Sci.* **2015**, 3, 1400085. <https://doi.org/10.3732/apps.1400085>.

- 2 Kress, W.J.; Erickson, D.L. A Two-Locus Global DNA Barcode for Land Plants: The Coding *rbcl* Gene Complements the Non-Coding *trnH-psbA* Spacer Region. *PLoS ONE* **2007**, *2*, e508. <https://doi.org/10.1371/journal.pone.000050>.
- 3 Calviño, C.I.; Downie, S.R. Circumscription and phylogeny of Apiaceae subfamily Saniculoideae based on chloroplast DNA sequences. *Mol. Phylogenet. Evol.* **2007**, *44*, 175-191. <https://doi.org/10.1016/j.ympev.2007.01.002>.
- 4 Taberlet, P.; Gielly, L.; Pautou, G.; Bouvet, J. Universal primers for amplification of three non-coding regions of chloroplast DNA. *Plant Mol. Biol.* **1991**, *17*, 1105-1109. <https://doi.org/10.1007/BF00037152>.
- 5 Hamilton, M.B. Four primer pairs for the amplification of chloroplast intergenic regions with intraspecific variation. *Mol. Ecol.* **1999**, *8*, 521-523.
- 6 De Castro, O.; Cozzolino, S.; Jury, S.L.; Caputo, P. Molecular relationships in *Genista* L. Sect. *Spartocarpus* Spach (Fabaceae). *Plant Syst. Evol.* **2002**, *231*, 91-108. <https://doi.org/10.1007/s006060200013>.
